# Supplementary material for: Wide and high resolution tension measurement using FRET in embryo
Source: PubMed Central journal article supplement (PMC4917836; doi:10.1038/srep28535), 2016-06-23
Supplement: srep28535-s1.pdf [file srep28535-s1.pdf]

## **Supplementary Information**

### **Wide and high resolution tension measurement using FRET in embryo**

Satoshi Yamashita<sup>1</sup>, Takashi Tsuboi<sup>1</sup>, Nanako Ishinabe<sup>1</sup>, Tetsuya Kitaguchi<sup>2,3</sup> & Tatsuo Michiue<sup>1</sup>

<sup>1</sup>Department of Life Sciences (Biology), Graduate School of Arts and Sciences, the University of Tokyo, Tokyo, Japan.

<sup>2</sup>Cell Signaling Group, WASEDA Bioscience Research Institute in Singapore (WABIOS), 11 Biopolis Way #05-02 Helios, Singapore 138667, Singapore.

<sup>3</sup>Organization for University Research Initiatives, Waseda University, #304, Block 120-4, 513 Wasedaturumaki-cho, Shinjuku-ku, Tokyo, 162-0041, Japan.

Table of contents:

1. Supplementary Figure 1 - Tension sensors localization and dynamics
2. Supplementary Figure 2 - Acceptor photo-bleaching

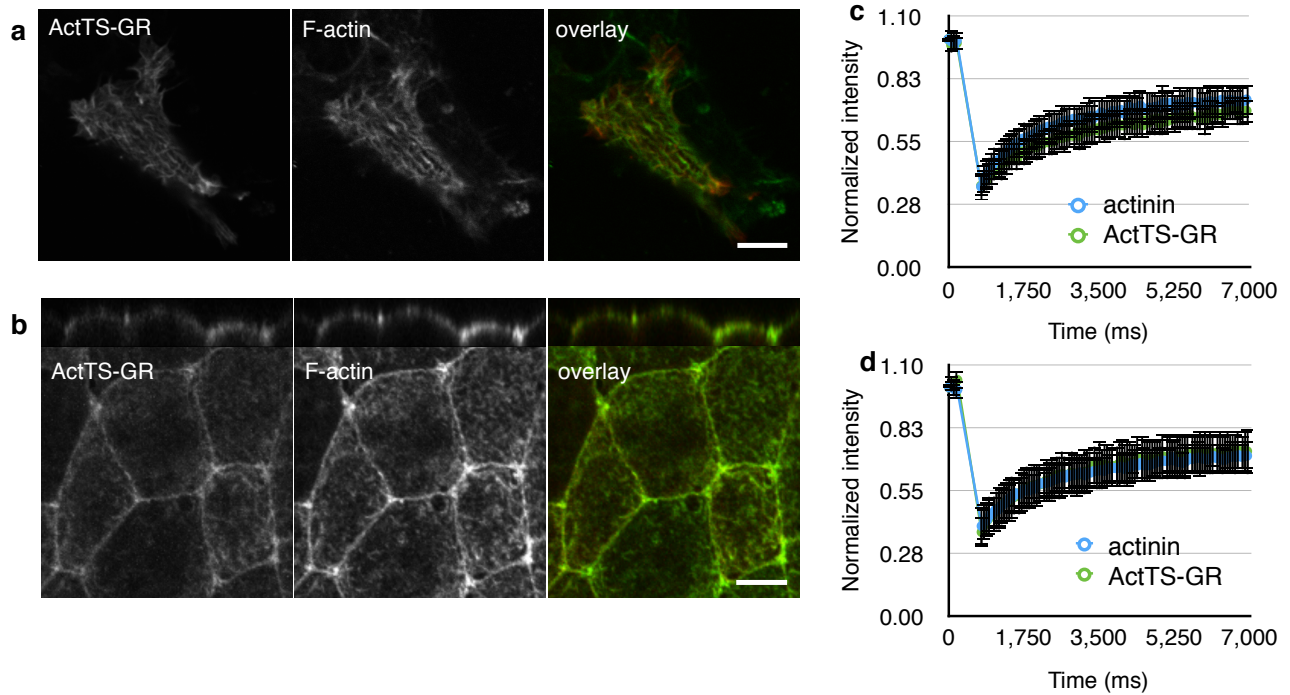

### Supplementary Figure 1

Tension sensors localization and dynamics.

(**a, b**) Localization of ActTS-GR in HEK cell (**a**) and in *Xenopus* ectoderm (**b**). Upper panels of **b** show side view projection of a 3D image stack. Left: ActTS-GR. Center: actin filaments. Right: overlay. The tension sensors co-localized with the actin filaments. (**c**) HEK cells were transfected with ActTS-GR or mCherry-tagged actinin, and a spot in a cell was photo-bleached for EGFP and fluorescence recovery was measured. ActTS-GR showed the same recovery curve with actinin, indicating that ActTS-GR was transported normally. (**d**) FRAP measurement in ectoderm expressing ActTS-GR or mCherry-tagged actinin. A spot on a cell-cell interface was photo-bleached. ActTS-GR showed normal dynamics. Values are average  $\pm$  SD,  $n = 10$ . Scale bar =  $10\mu\text{m}$ .

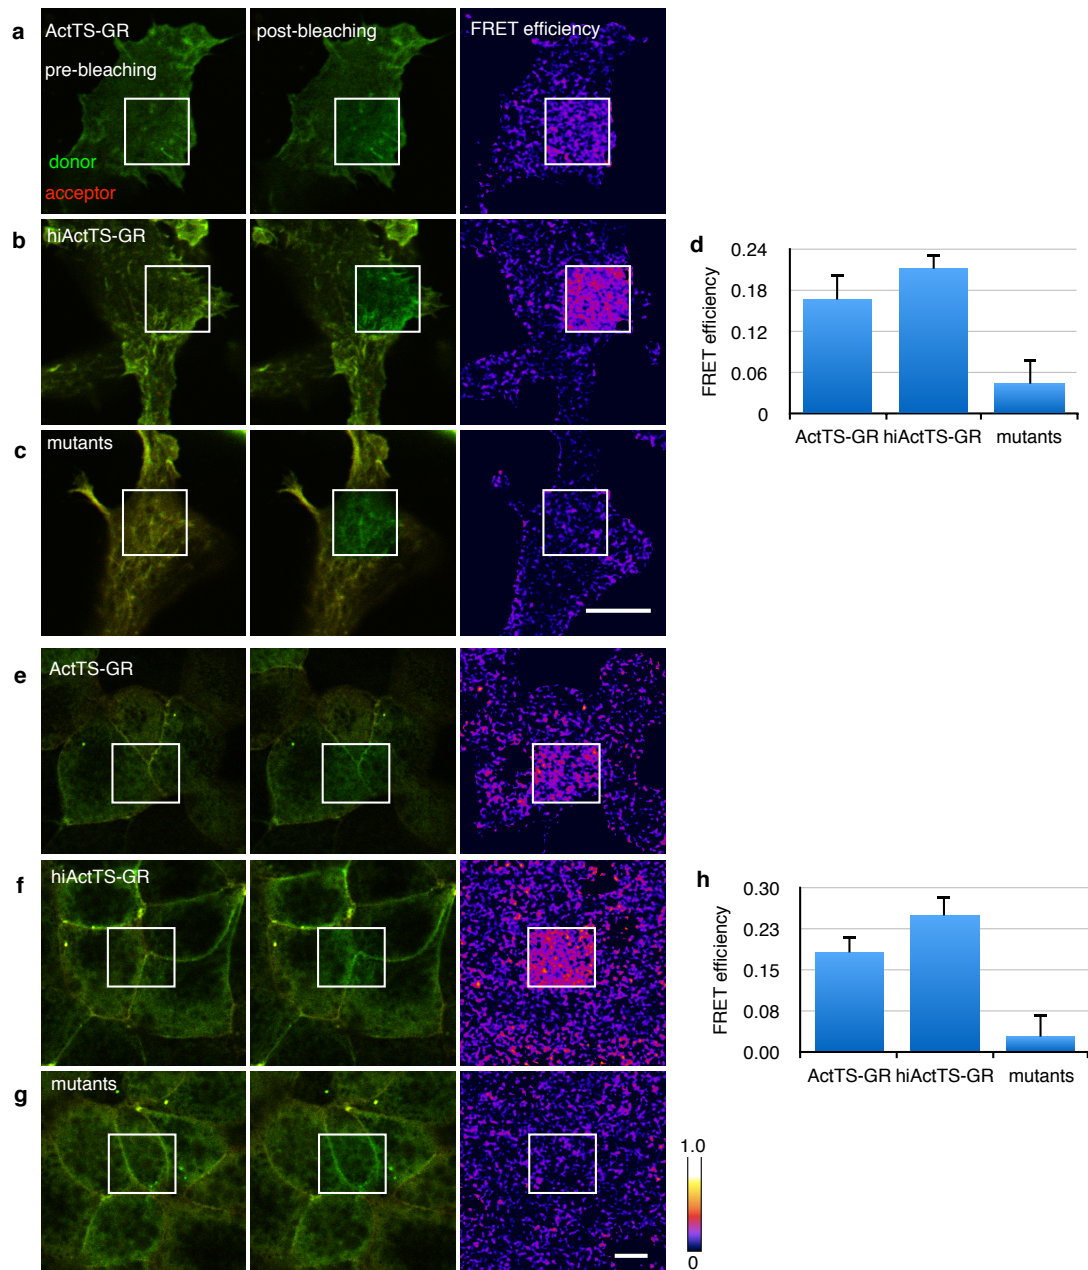

## Supplementary Figure 2

Acceptor photo-bleaching.

**(a-c)** Images of HEK cell expressing ActTS-GR **(a)**, hiActTS-GR **(b)**, or pair of fluorescence mutants ActTS-GR before bleaching (left), after bleached (center), and their FRET efficiencies (right). mCherry in a white rectangle was bleached. **(d)** Quantification of FRET efficiency. Values are average  $\pm$  SD,  $n = 10$ . **(e-g)** Images of *Xenopus* ectoderm expressing ActTS-GR **(e)**, hiActTS-GR **(f)**, or mutants pair **(g)** before bleaching (left), after bleaching (center), and their FRET efficiencies (right). **(h)** Quantification of fluorescence increase in ectoderm.  $n = 10$ . Scale bars =  $10\mu\text{m}$ .
